# Supplementary material for: GUS-1: a mordenite-like molecular sieve with the 12-ring channel of ZSM-12
Source: Royal Society of Chemistry journal article supplement (doi:10.1039/b005225f), 2000-01-01
Supplement: b005225f.doc [file b005225f.doc]

# Supplementary data

**GUS-1: a mordenite-like molecular sieve with the 12-ring channel of ZSM-12**

Jacques Plévert,*a*† Yoshihiro Kubota,*b* Takahisa Honda,*b* Tatsuya Okubo,*a* and Yoshihiro Sugi *b*

*a Department of Chemical System Engineering, The University of Tokyo, Tokyo 113-8656, Japan, and b Department of Chemistry, Faculty of Engineering, Gifu University, Gifu 501-1193, Japan, E-mail: JPlevert@asu.edu; kubota@apchem.gifu-u.ac.jp*

Synthesis procedure and characterization of the structure directing agent 1,1’-butylenedi(4-aza-1-azonia-2,5-dimethylbicyclo[2.2.2]octane) dihydroxide (**1**-hydroxide):

A solution of 1,4-dibromobutane (6.48 g, 30 mmol) in acetone (44 ml) was added dropwise to a solution of 2,5-dimethyl-1,4-diazabicyclo[2.2.2]octane (14.02 g, 100 mmol) in acetone (140 ml) and methanol (30 ml) at room temperature, and the whole mixture was stirred at 70ºC for 70 h. The mixture was filtered and the residue was washed with a mixture of methanol (20 ml) and diethyl ether (200 ml) to give white solid of **1**-bromide (8.54 g, 57.1 %). Mp. 253-260ºC (dec.)

1H-NMR (400MHz, D2O) δ:1.27, 1.28, 1.45, and 1.47 (each 3H, s), 1.78-1.95 (4H, m), 2.68 -3.72 (24H, m). 13C-NMR (100MHz, D2O) δ:15.31, 15.47, 17.59, 17.73, 19.21, 38.65, 46.80, 47.24, 47.94, 49.68,49.88, 54.15, 54.91, 55.77, 57.85, 58.88, 60.48, and 60.58. IR (neat): 3423 (br), 2974, 1638, 1460, 1400, 1333, 1263, 1246, 1221, 1184, 1136, 1109, 1086, 1065, 1036, 1013, 993, 945, 908, 874, 833, 773, 743, 683, 565 cm-1.

Diaion® SA10A (OH) (Mitsubishi Chemical Co.) anion exchange resin (143.7 g, corresponding to 213 mmol of exchange capacity) was added to a solution of **1**-bromide (20.01 g, 53.2 mmol) in water (200 ml) and the whole mixture was gently stirred at room temperature for 47 h. After filtration, the aqueous solution was concentrated to 79.0 g to give 0.661 mmol·g-1 of **1**-hydroxide based on titration of the resulting solution. The yield was 98.2 %. The NMR **1**-hydroxide spectra of were identical with that of **1**-bromide.

# Fractional atomic coordinates for GUS-1. Crystal data: Si32O64, orthorhombic, a = 16.4206(4), b = 20.0540(4), c = 5.0464(1) Å, V = 1661.8(1) Å3, space group C222.

| atoms | x | y | z |
| --- | --- | --- | --- |
| Si1  Si2  Si3  Si4  O1  O2  O3  O4  O5  O6  O7  O8  O9  O10 | .3074(17)  .1818(21)  .0937(16)  .0964(17)  .3549(30)  .384(4)  .2500  .2644(26)  .1537(30)  .212(4)  .1151(31)  .0000  .1021(18)  .0000 | .1879(18)  .0767(13)  .1222(15)  .2819(15)  .1874(29)  .2092(25)  .2500  .1170(21)  .0785(24)  .0000  .1023(21)  .1006(35)  .2021(24)  .297(5) | .478(8)  .527(11)  .016(13)  -.002(14)  .754(15)  .307(14)  .522(24)  .477(16)  .834(11)  .5000  .317(13)  .0000  -.013(11)  .0000 |
